## Novel therapies for cancer-induced bone pain

1 **Rayan Haroun<sup>1</sup>, Samuel J. Gossage<sup>1</sup>, Federico Iseppon<sup>1</sup>, Alexander Fudge<sup>1</sup>, Sara Caxaria<sup>2</sup>,**  
2 **Manuel Arcangeletti<sup>1</sup>, Charlotte Leese<sup>3</sup>, Bazbek Davletov<sup>3</sup>, James J. Cox<sup>1</sup>, Shafaq Sikandar<sup>2</sup>,**  
3 **Fraser Welsh<sup>4</sup>, Iain P. Chessell<sup>4</sup>, John N. Wood<sup>1</sup>**

4 <sup>1</sup>Molecular Nociception Group, Wolfson Institute for Biomedical Research (WIBR), University  
5 College London (UCL), London, WC1E 6BT, United Kingdom.

6 <sup>2</sup> William Harvey Research Institute, Barts and the London School of Medicine and Dentistry,  
7 Queen Mary University of London, London, United Kingdom.

8 <sup>3</sup> Department of Biomedical Science, University of Sheffield, South Yorkshire S10 2TN,  
9 United Kingdom.

10 <sup>4</sup> AstraZeneca BioPharmaceuticals R&D, Neuroscience, Discovery Centre, Biomedical  
11 campus, 1 Francis Crick Ave, Cambridge, United Kingdom, CB2 0AA.

### 12 \* Correspondence:

13 John N. Wood

14 [j.wood@ucl.ac.uk](mailto:j.wood@ucl.ac.uk)

15 **Keywords:** Cancer-induced bone pain, dorsal root ganglia, acid-sensing ion channels,  
16 voltage-gated sodium channels, modified botulinum compounds, tumor necrosis factor  
17 alpha, nerve growth factor.

### 18 1. Abstract

19 Cancer pain is a growing problem, especially with the substantial increase in cancer survival. Reports  
20 indicate that bone metastasis, whose primary symptom is bone pain, occurs in 65-75% of patients with  
21 advanced breast or prostate cancer. We optimized a preclinical *in vivo* model of cancer-induced bone  
22 pain (CIBP) involving the injection of Lewis Lung Carcinoma cells into the intramedullary space of the  
23 femur of C57BL/6 mice or transgenic mice on a C57BL/6 background. Mice gradually reduce the use of  
24 the affected limb, leading to altered weight bearing. Symptoms of secondary cutaneous heat  
25 sensitivity also manifest themselves. Following optimization, three potential analgesic treatments  
26 were assessed; 1) single ion channel targets (targeting the voltage-gated sodium channels Nav1.7,  
27 Nav1.8, or acid-sensing ion channels), 2) silencing  $\mu$ -opioid receptor-expressing neurons by modified  
28 botulinum compounds, and 3) targeting two inflammatory mediators simultaneously (nerve growth  
29 factor (NGF) and tumor necrosis factor (TNF)). Unlike global Nav1.8 knockout mice which do not show  
30 any reduction in CIBP-related behavior, embryonic conditional Nav1.7 knockout mice in sensory  
31 neurons exhibit a mild reduction in CIBP-linked behavior. Modified botulinum compounds also failed  
32 to cause a detectable analgesic effect. In contrast, inhibition of NGF and/or TNF resulted in a significant  
33 reduction in CIBP-driven weight-bearing alterations and prevented the development of secondary  
34 cutaneous heat hyperalgesia. Our results support the inhibition of these inflammatory mediators; and  
35 more strongly their dual inhibition to treat CIBP, given the superiority of combination therapies in  
36 extending the time needed to reach limb use score zero in our CIBP model.

### 37 2. Introduction

38 Cancer-induced bone pain (CIBP) is the most common symptom in patients with bone metastases (1).  
39 Reports indicate that bone metastasis occurs in 65-75% of patients with advanced breast or prostate  
40 cancer and approximately 30-40% of patients with advanced lung cancer (2). Bone-metastasizing

41 cancers cause pain due to the interplay between peripheral and central-related factors. Amongst the  
42 peripheral factors, acidosis is believed to be a major component, as bone metastasizing cancers result  
43 in excessive osteoclast activation, which subsequently leads to acidosis. Acidosis is known to cause  
44 pain, as sensory neurons contain a plethora of acid-sensing ion channels and TRPV1 transient receptor  
45 potential channels. Additionally, tumor cells and their associated stromal cells release mediators that  
46 are linked to pain, and these include nerve growth factor (NGF) and tumor necrosis factor alpha  
47 (TNF $\alpha$ ). Moreover, research has highlighted the role of neuropathic pain in CIBP, leading to peripheral  
48 and central sensitization (3). We, therefore, investigated three potential modalities to treat CIBP: 1)  
49 single ion channel targets, namely voltage-gated sodium channels (Na $v$ 1.7 and Na $v$ 1.8) and acid-  
50 sensing ion channels 2) silencing  $\mu$ -opioid receptor-expressing neurons using modified botulinum  
51 compounds and 3) dual targeting of tumor-derived products (NGF and TNF $\alpha$ ).

52 The first approach was to target voltage-gated sodium channels and acid-sensing ion channels. Several  
53 pathophysiological studies have highlighted the role of enhanced expression and/or enhanced  
54 conductance of voltage-gated sodium channels as the final pain-causing mechanism for many  
55 mediators released in CIBP. For example, Qiu et al. (4) showed that the expression of Na $v$ 1.8 and Na $v$ 1.9  
56 increases significantly in Sprague-Dawley rats bearing 256 mammary gland carcinoma cells in the  
57 intramedullary space of the tibia. Similarly, the activity of Na $v$ 1.8 channels can be modulated by several  
58 inflammatory mediators indirectly via their effects on protein kinases that phosphorylate Na $v$ 1.8 (5-7).  
59 NGF, which is considered a hallmark of CIBP, was shown to increase the expression of Na $v$ 1.7 and  
60 Na $v$ 1.8 and can allow the opening of these channels to take place at more negative membrane  
61 potentials (8-10). These studies show that voltage-gated sodium channels could play a crucial role in  
62 CIBP, and therefore, a significant part of this work focused on these channels. The first voltage-gated  
63 sodium channel targeted here is Na $v$ 1.7. This channel has gained huge interest because loss of function  
64 mutations in the *SCN9A* gene, which encodes for Na $v$ 1.7 channels, lead to pain insensitivity in humans  
65 (11). The role of this channel in pain is also supported by gain of function mutations in the *SCN9A* gene  
66 which are linked to erythromelalgia (12) and pain conditions like paroxysmal extreme pain disorder  
67 (13). Several animal models have been generated to study the role of Na $v$ 1.7 in pain sensation. The  
68 global Na $v$ 1.7 knockout mice die soon after birth, presumably due to the inability to feed (14).  
69 Therefore, conditional knockout models were generated, and results from these mouse models have  
70 shown that Na $v$ 1.7 is a critical player in acute pain sensation and chronic pain models (15, 16). The  
71 second channel studied here is Na $v$ 1.8, which has been shown to play a role in inflammatory and  
72 neuropathic pain conditions (17-20). Looking at CIBP specifically, it was shown that ablating or silencing  
73 Na $v$ 1.8+ neurons reduces pain-like behavior associated with CIBP in mice (21), and blocking (22) or  
74 downregulating (23) this channel resulted in an analgesic effect in rat models of CIBP. Therefore, we  
75 were also interested in checking whether congenital Na $v$ 1.8 knockout mice have reduced pain-like  
76 behavior after CIBP. We also looked at acid-sensing ion channels, mainly because mediators released  
77 in CIBP can lead to increased expression of acid-sensing ion channels (ASICs) (24) and because local  
78 acidosis is a proposed factor that contributes to CIBP (3). To target ASICs, we relied on mambalgin-1.  
79 Mambalgin-1 is a 57-amino acid peptide found in African black mamba venom that blocks subtypes of  
80 acid-sensing ion channels. Analgesia obtained after mambalgin application is comparable to that  
81 obtained following morphine administration (25). What makes mambalgins an interesting therapeutic  
82 option is that they lack toxicity, and their analgesic effect does not depend on the opioid system (25).

83 The second approach utilized here is to silence  $\mu$ -opioid-expressing neurons by modified botulinum  
84 compounds as a longer-lasting and potentially safer alternative to opioid therapy. Small doses of  
85 morphine are administered intrathecally as part of a successful treatment option for refractory cancer  
86 pain. While efficacious, it was also reported that this treatment option affected the day-to-day  
87 activities of cancer patients and is linked to tolerance (26). Additionally, previous work indicated that  
88 chronic morphine treatment exaggerates CIBP, bone loss, and spontaneous fracture in a mouse model  
89 of bone cancer (27). Therefore, alternative means of targeting the opioid system could be beneficial.  
90 Botulinum neurotoxin serotype A is composed of a light-chain zinc endopeptidase as well as a heavy

91 chain that binds to neuronal receptors and promotes light-chain transfer across the endosomal  
92 membrane (28). Once incorporated within the cell, the light chain can inhibit neurons for many  
93 months by cleaving synaptosomal-associated protein 25 (SNAP25), an important protein for  
94 neurotransmitter release (29-31). Maiarù et al. (32) leveraged a recently established "protein stapling"  
95 technique (29, 31) that enabled the nonchemical linking of recombinantly generated proteins,  
96 employing core components of the SNARE (soluble N-ethylmaleimide-sensitive factor attachment  
97 protein receptor) complex, to achieve irreversible linking of two distinct peptide segments into a  
98 functional unit (30). This group used SNARE proteins to bind the light-chain domain of botulinum  
99 neurotoxin type A (BOT) to dermorphin, which targets  $\mu$ -opioid receptor-expressing neurons. This  
100 construct renders the BOT specific for the  $\mu$ -opioid receptor-expressing neurons, solving the protein  
101 toxicity problems related to botulinum-based compounds. After binding to the  $\mu$ -opioid receptors, the  
102 construct is internalized due to the presence of the translocation domain. Subsequently, the protease  
103 domain of the toxin is released into the cytoplasm, causing a profound suppression of  
104 neurotransmitter release. This group found that the intrathecal injection of 100 ng of this construct to  
105 mice resulted in significant analgesia following neuropathic pain and inflammatory pain models (32).  
106 The authors postulated that the analgesic target for this construct did not depend on the  $\mu$ -opioid  
107 receptor-positive primary afferents but rather the  $\mu$ -opioid receptor-positive dorsal horn neurons  
108 (32). To assess its therapeutic potential in CIBP, Derm-BOT was used to silence the  $\mu$ -opioid receptor-  
109 expressing neurons.

110 The third approach was to target two tumor-derived inflammatory mediators simultaneously. The two  
111 targets chosen were NGF and TNF $\alpha$ . NGF can be produced by various types of cancer cells in the bone  
112 (e.g., those derived from primary tumors of the breast and prostate). On the other hand, TNF $\alpha$  is one  
113 of the cytokines contributing to pain in bone cancer models as not only cancer cells, but also immune  
114 cells (including macrophages, leukocytes, and thrombocytes), tend to release it in CIBP (33). NGF can  
115 lead to the sensitization of sensory neurons directly by increasing the expression of ion channels linked  
116 to nociceptive signal transduction and transmission (such as TRPV1, ASICs, and voltage-gated sodium  
117 channels) through its effects after binding TrkA receptors. NGF also triggers the release of  
118 inflammatory mediators (including histamine, serotonin, and more NGF) from immune cells (34, 35).  
119 Due to the transcriptional changes caused by NGF-mediated TrkA activation, neurotransmitters like  
120 substance P, calcitonin gene-related peptide (CGRP), and brain-derived neurotrophic factor are also  
121 increased. The binding of all these peptides to their receptors on the second-order neuron together  
122 with glutamate may result in intense depolarization of the postsynaptic receptors of the second-order  
123 neurons, increasing the probability of N-methyl-D-aspartate (NMDA) receptor activation, enhancing  
124 the probability of central sensitization. Therefore, NGF is implicated not only in peripheral  
125 inflammation but also in increasing the excitability of primary afferents by causing various  
126 transcriptional changes (24). The usefulness of targeting NGF in CIBP is supported by clinical (36) and  
127 preclinical findings (37-39). Regarding TNF $\alpha$ , it contributes to heat and mechanical hyperalgesia in  
128 CIBP (40-45). Inhibiting the effects of TNF $\alpha$  could be achieved by using mAbs against it or its soluble  
129 receptor, TNFR1 (46, 47). In this report, MEDI578 was used to inhibit NGF, and etanercept, which can  
130 also bind TNF $\beta$ , was used to inhibit TNF $\alpha$ .

### 131 3. Materials and Methods

#### 132 3.1 Cell culture

133 Lewis lung carcinoma (LL/2) cells (from American Type Culture Collection (ATCC)) were cultured in a  
134 medium containing 90% Dulbecco's Modified Eagle Medium (DMEM) and 10% fetal bovine serum  
135 (FBS) and 0.1% Penicillin/Streptomycin for 14 days before the surgery. DMEM was supplemented  
136 with L-glutamine (1%) and glucose (4.5 g/liter). The cells were sub-cultured whenever ~80%  
137 confluency was reached, which was done a day before the surgery. On the surgery day, LL/2 cells  
138 were harvested by scraping and were centrifuged at a speed of 1500 rpm for two mins. The  
139 supernatant was removed, and the cells were resuspended in a culture medium that contained

140 DMEM to attain various final concentrations:  $\sim 2 \times 10^7$  cells/ml,  $2 \times 10^6$  cells/ml, or  $2 \times 10^5$  cells/ml for the  
141 CIBP model optimization experiments and  $\sim 2 \times 10^6$  cells/ml (resulting in the inoculation of  $\sim 2 \times 10^4$ ) for  
142 all the remaining studies. The cell counting and viability check were carried out using the Countess  
143 Automated Cell Counter (Thermo Fisher Scientific).

## 144 3.2 Mice

145 Mice were housed in groups of 2–5 per cage with a 12-hour light/dark cycle and were allowed free  
146 access to water and a standard diet. Mice were acclimatized for two weeks before the surgery, and  
147 the baseline measurements were taken at the end of these two weeks. All experiments were  
148 performed with the approval of personal and project licenses from the United Kingdom Home Office  
149 according to guidelines set by the Animals (Scientific Procedures) Act 1986 Amendment Regulations  
150 2012 and guidelines of the Committee for Research and Ethical Issues of IASP.

## 151 3.3 Breeding strategies for transgenic mice

### 152 3.3.1 Conditional Nav<sub>v</sub>1.7 knockout mice

153 To generate conditional Nav<sub>v</sub>1.7 knockout mice in the DRG neurons, heterozygous mice expressing Cre  
154 under the control of the advillin promoter (identifier B6.129P2-Avil<sup>tm2(cre)Fawa/J</sup>, (48)) and homozygous  
155 floxed for Nav<sub>v</sub>1.7 (identifier Scn9a<sup>tm1.1Jnw</sup>, (14)) were crossed. Primers used to genotype Nav<sub>v</sub>1.7 flox  
156 mice and Advillin-Cre mice can be found in (49).

### 157 3.3.2 Nav<sub>v</sub>1.8 knockout mice

158 Homozygous global Nav<sub>v</sub>1.8 knockout mice were crossed with heterozygous Nav<sub>v</sub>1.8 knockout mice  
159 (identifier Scn10a<sup>tm1Jnw</sup>, (17)). Resulting homozygous Nav<sub>v</sub>1.8 knockout mice were to test the effect of  
160 channel knockout by comparing them to the heterozygous littermates (control). Heterozygous null  
161 mutant Nav<sub>v</sub>1.8 mice were used as controls since they were shown to be phenotypically identical to  
162 wild-type mice (14). Genotyping for Nav<sub>v</sub>1.8 knockout mice can be found in (50).

## 163 3.4 Surgery

164 Surgery was carried out on anesthetized mice (males and females). Anesthesia was achieved using  
165 1.5-3% isoflurane. The legs and the thighs of the mice were shaved, and the shaved area was cleaned  
166 using hibiscrub solution. A sterile lacri-lube was applied to the eyes. The reflexes of the mice to  
167 pinches were checked to ensure successful anesthesia. An incision was made in the skin above and  
168 lateral to the patella on the left leg. The patella and the lateral retinaculum tendons were loosened  
169 to move the patella to the side and expose the distal femoral epiphysis. A 30G needle was used to  
170 drill a hole through the femur to permit access to the intramedullary space of the femur. The 30G  
171 needle was removed, and a 0.3ml insulin syringe was used to inoculate  $\sim 2 \times 10^4$  LL/2 cells suspended  
172 in DMEM (for the optimization studies, a range of LL/2 cell numbers was tested). The hole in the  
173 distal femur was sealed using bone wax (Johnson & Johnson). To ensure that there was no bleeding,  
174 the wound was washed with sterile saline. Following that, the patella was re-placed into its original  
175 location, and the skin was sutured using 6–0 absorbable vicryl rapid (Ethicon). Lidocaine was applied  
176 at the surgery site, and the animals were placed in the recovery chamber and monitored until they  
177 recovered. The choice of the animal number was based on previous experience from animal  
178 experiments in our lab.

## 179 3.5 Compound administration and doses

180 For the NGF/TNF studies, MEDI578 (MedImmune, 3mg/kg) and/or etanercept (Pfizer, 10mg/kg) were  
181 administered intraperitoneally on day 10 after surgery. The control group for this study included 13  
182 mice that were treated with PBS and 10 mice treated with NIP-228 (isotype control antibody for  
183 MEDI578) at a 3mg/kg dose. All compounds were dissolved so that each mouse received 10 $\mu$ l of the  
184 diluted biologic per gram of its body weight. For mambalgin-1 testing, mambalgin-1 (Smartox) was  
185 dissolved in PBS and was used at a dose of 34 $\mu$ M via intrathecal injection. When morphine was  
186 administered intrathecally, a 60ng dose was used, and when administered subcutaneously a

187 15mg/kg dose was used. Morphine used in this study was used in the form of morphine sulfate  
188 (Hamlen pharmaceuticals). For the Derm-BOT study, mice received an intrathecal injection of 100ng  
189 of Derm-BOT (or the molar equivalent of the control (unconjugated BOT)) (32). Derm-BOT and  
190 unconjugated BOT were a kind present from Professor Bazbek Davletov (University of Sheffield, UK).

### 191 3.6 Behavioral tests

192 After the surgery, the limb-use score of mice was checked daily. Any score less than four on the sixth  
193 day after the surgery caused the mouse to be sacrificed and excluded from the study. This rule  
194 ensured that the observed pain phenotype was only due to the cancer growth and not a  
195 complication from the surgery.

#### 196 3.6.1 Limb-use score

197 The mice housed in the same cage were placed together in a glass box (30 × 45 cm) for at least five  
198 minutes. Then each mouse was left in the glass box on its own and was observed for ~4 minutes, and  
199 the use of the ipsilateral limb was estimated using the standard limb use scoring system in which: 4  
200 indicates a normal use of the affected limb; 3 denotes slight limping (slight preferential use of the  
201 contralateral limb when rearing); 2 indicates clear limping; 1 clear limping, and with a tendency of  
202 not using the affected limb; and 0 means there is no use of the affected limb. Reaching a limb-use  
203 score of zero was used as an endpoint for the experiment.

#### 204 3.6.2 Static weight-bearing

205 The weight-bearing test was done as previously described by (21) and was reported as a percentage  
206 of the total weight on both paws.

#### 207 3.6.3 Hargreaves' test

208 The Hargreaves' test was used to measure secondary cutaneous heat hyperalgesia and was  
209 performed as previously described by (51).

#### 210 3.6.4 Analysis of the median time needed to reach limb-use score zero

211 The time needed for a mouse to reach zero limb-use score was considered an endpoint, and any  
212 mouse that reached this score was sacrificed. Therefore, the time needed to reach this score is  
213 considered an indirect pain measure, when the number of cancer cells injected is similar between  
214 mice. It is important to note that mice were also sacrificed if the tumor caused the mice to lose 15%  
215 of their body weight measured from the day of the surgery.

### 216 3.7 Micro-computed tomography (μCT)

217 After each mouse was sacrificed (at limb use score zero), its femurs, both ipsilateral and  
218 contralateral, were dissected. Femurs were then fixed using a 4% paraformaldehyde (PFA) solution  
219 for 24 hours. Then, PFA was removed, and femurs were washed using phosphate-buffered saline  
220 (PBS). Femurs were then kept in 70% ethanol (v/v) at 4°C until scanned using μCT.

### 221 3.8 Statistical analyses

222 The mixed-effects model (REML) was used with multiple comparisons to compare the pain-like  
223 behavior between two groups over time. In all statistical tests, the difference between groups is  
224 considered significant when the p-value is <0.05. All statistical analyses were performed using  
225 GraphPad Prism 10. Data are presented as mean ± standard error of the mean (SEM). For comparing  
226 the time needed to reach limb-use score zero, the Log-rank (Mantel-Cox) and the Gehan-Breslow-  
227 Wilcoxon tests were used, and the median duration to reach this limb-use score was compared  
228 between groups. The Dunnett's test for multiple comparisons was used to compare the mean results  
229 after the surgery with the baseline readings. To compare three (or more) groups with each other, the  
230 one-way analysis of variance (ANOVA) test was used, followed by multiple comparisons. Statistical  
231 significance is expressed as: \*p < .05; \*\*p < .01; \*\*\*p < .001, \*\*\*\*p < .0001.

## 232 4. Results

### 233 4.1 CIBP model optimization

234 Previous published papers from our lab studying CIBP in C57BL/6 mice or transgenic mice on a C57BL/6  
235 background relied on injecting  $2 \times 10^5$  LL/2 cells in the intramedullary space of the femur. In this model,  
236 the median time needed to reach limb-use score zero was short (less than 20 days). Therefore, we  
237 attempted to reduce the number of LL/2 cells injected to increase the time needed to reach limb-use  
238 score zero and slow down the pain phenotype progression in order to make a model that is more  
239 representative of chronic pain conditions. Therefore, two lesser cancer cell numbers were attempted,  
240  $2 \times 10^4$  (red, Figure 1) and  $2 \times 10^3$  (blue, Figure 1), and they were compared to the original cancer cell  
241 number (black, Figure 1). The reduction of the number of cancer cells injected significantly increased  
242 the study duration and showed a dose-dependent reduction in pain phenotype intensity. By referring  
243 to the limb scoring results (Figure 1 A), it appears that the mean limb score becomes significantly lower  
244 than the baseline readings after 10 days for the  $2 \times 10^5$  cells group, 15 days for the  $2 \times 10^4$  cells group,  
245 and 19 days for the  $2 \times 10^3$  cells group. Weight-bearing reduction followed similar dose-dependent  
246 trends (Figure 1B).

247 Because decreasing the number of cancer cells injected slowed the speed of the pain phenotype  
248 progression, we decided to reduce the number of cancer cells in our subsequent experiments.  
249 Between the two lesser cancer cell numbers ( $2 \times 10^4$  and  $2 \times 10^3$  cells),  $2 \times 10^4$  cells was selected to be  
250 used for the following experiments as it showed less variability between mice. Additionally, in the  
251 group injected with  $2 \times 10^3$  LL/2 cells two (out of 12) mice did not develop any pain-like behavior until  
252 the end of the study, i.e., day 40 after surgery.  $\mu$ CT analyses indicated that injecting  $2 \times 10^4$  LL/2 cells  
253 into the intramedullary space of the femur of C57BL/6 mice caused a clear bone degradation (Figure  
254 2).

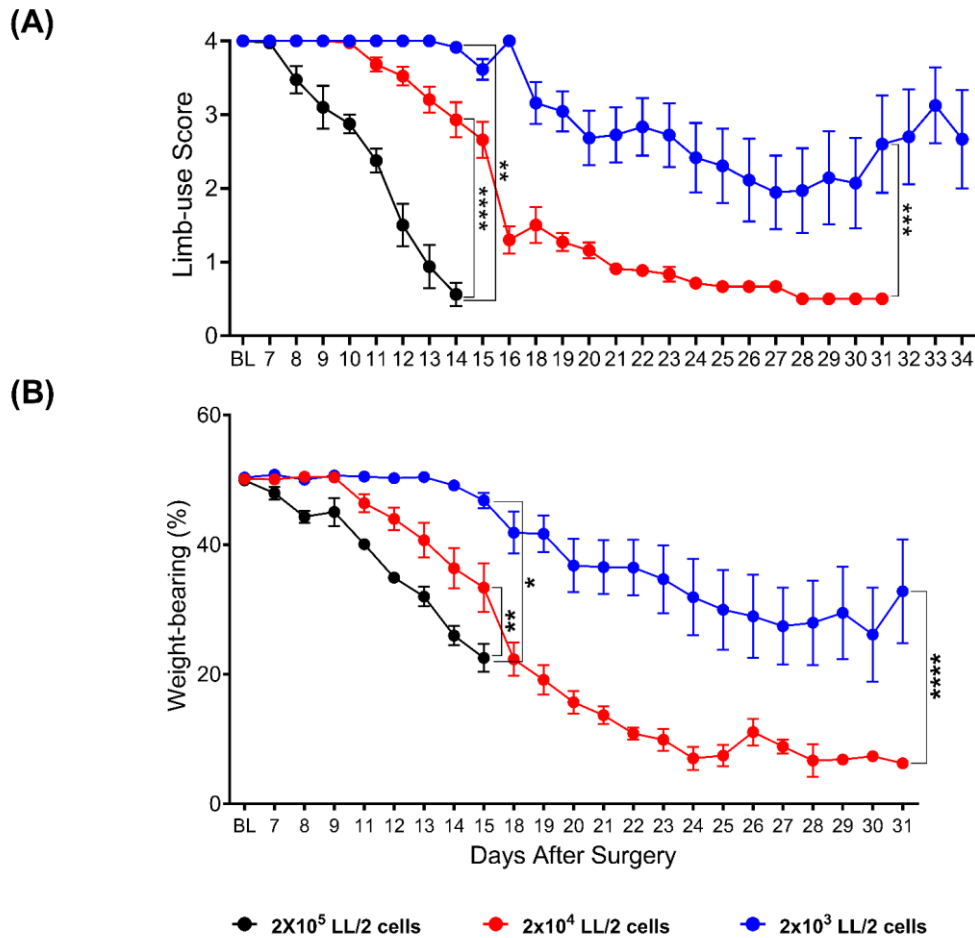

255

256 **Figure 1: The injection of LL/2 cells into the intramedullary space of the femur of mice caused a**  
257 **significant decline in the limb-use score (A) and the weight-borne on the ipsilateral limb (B). This**  
258 **decline was dependent on the number of LL/2 cells injected. (A) The mean limb-use score became**  
259 **significantly lower than the baseline on day 10 for the 2x10<sup>5</sup> cancer cells group (p-value= 0.0095), day**  
260 **15 for the 2x10<sup>4</sup> cancer cells group (p-value 0.0007), and day 19 for the 2x10<sup>3</sup> cancer cells group (p-**  
261 **value 0.0349). (B) The analysis of the weight-bearing results showed that the reduction in the weight-**  
262 **bearing became significant (compared to the baseline) on day 11 after surgery for the 2x10<sup>5</sup> group (p-**  
263 **value= 0.0444), on day 12 after the surgery (p-value= 0.0456) in the mice that received 2x10<sup>4</sup> cells**  
264 **and after 14 days in the mice that received 2x10<sup>3</sup> cancer cells (p-value 0.0212).**

265 *Analyses of the limb-use scoring, and weight-bearing results showed that the effect of the cancer*  
266 *cells is statistically significant, with the speed of reduction of limb-use and weight-borne on the*  
267 *ipsilateral limb being directly proportional to the number of cancer cells inoculated (asterisks of*  
268 *significance are shown on the graph (the mixed-effects model)). At the baselines, n=12 for the 2x10<sup>4</sup>*  
269 *group and the 2x10<sup>3</sup> group (equal mix of sexes), and n=5 males for the 2x10<sup>5</sup> cancer cells group.*  
270 *REML analysis (followed by Dunnett's test for multiple comparisons) was used to estimate the time*  
271 *required to cause a significant drop in either the weight-bearing or the limb-use score compared to*  
272 *the baseline after inoculating a specific number of cancer cells in the femur.*

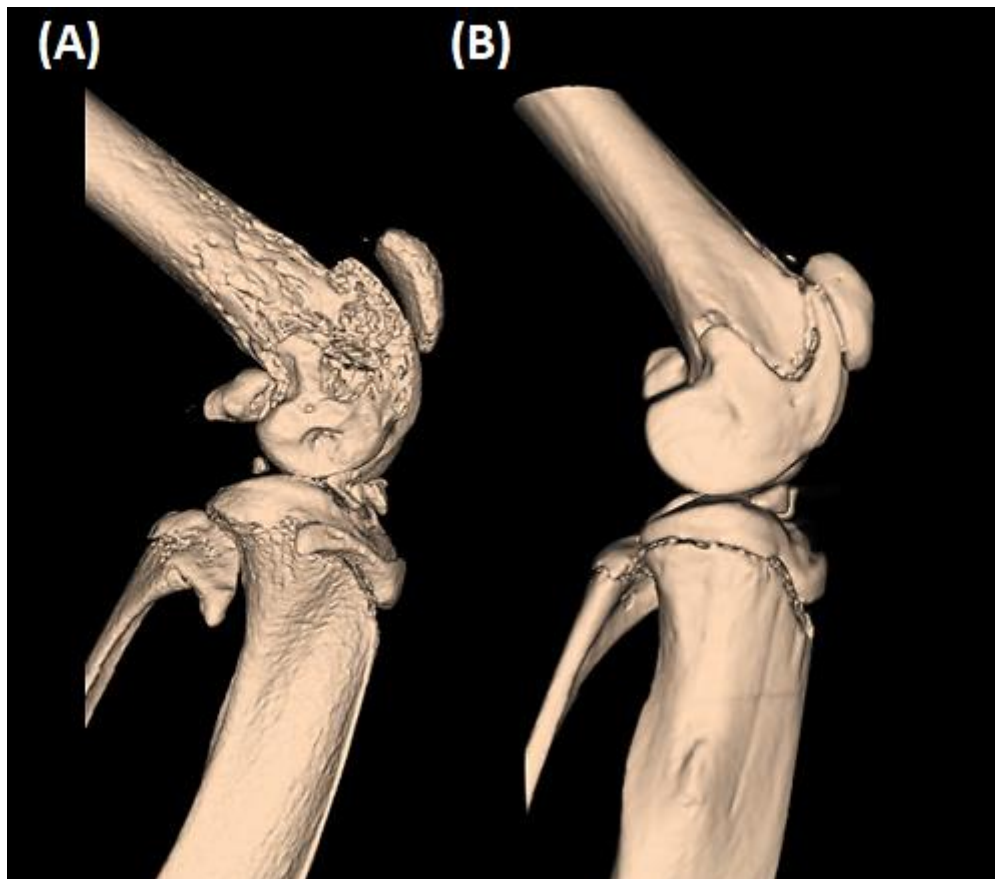

273

274 **Figure 2:  $\mu$ CT imaging showing osteolysis induced by the growth of LL/2 cells in the femurs of**  
275 **C57BL/6 mice. The tumor growth causes bone degradation in the ipsilateral femur (A), leaving the**  
276 **contralateral femur (B) unaffected.**

## 277 4.2 Single ion channel targets in CIBP

### 278 4.2.1 Voltage-gated sodium channels and CIBP

#### 279 4.2.1.1 *Nav1.7 conditional knockout mice show a modest reduction in pain-like behavior* 280 *associated with CIBP*

281 Previous research demonstrated that several mediators derived from cancer cells and their  
282 associated stromal cells sensitize and/or increase the expression of Nav1.7 channels in rodents (8-10,  
283 52). Therefore, the role of this channel in CIBP was tested by assessing whether mice in which this  
284 channel is conditionally knocked out in DRG neurons could show a reduction in the pain phenotype  
285 caused by bone cancer. Therefore, conditional Nav1.7 knockout mice (and Cre-negative littermates)  
286 underwent CIBP surgery to inoculate LL/2 cells into their left femurs. The Nav1.7 conditional  
287 knockout mice exhibited modestly better mean limb-use scores compared to their littermates (Figure  
288 3A (i)) and showed a slower reduction in the weight-borne on the ipsilateral limb (Figure 3A (ii)).

#### 289 4.2.1.2 *Congenital global Nav1.8 knockout mice show a normal progression of pain-like behavior* 290 *after CIBP*

291 Previous work using neuronal ablation techniques and neuronal silencing tools indicated that  
292 Nav1.8+ neurons play a role in CIBP (21). Additionally, knocking down the expression of this channel  
293 reduced CIBP in rats (23). Accordingly, we decided to investigate whether deleting Nav1.8 channels  
294 congenitally could reduce CIBP in mice. Our results showed that Nav1.8 knockout mice developed  
295 similar pain-like behavior compared to their littermates in our CIBP model when tested using limb-  
296 use scoring (Figure 3B (i)) and weight-bearing (Figure 3B (ii)).



297        4.2.2 Acid-sensing ion channels and CIBP

298        As previous work showed that mambalgins result in an analgesic effect comparable to morphine but  
299        with fewer side effects, we decided to use mambalgin-1 to block acid-sensing ion channels in our  
300        CIBP model. Our results indicate that the intrathecal administration of 34  $\mu$ M of mambalgin-1 did not  
301        result in a significant alteration of pain-like behavior after CIBP compared to the vehicle (Figure 3C).  
302        Behavioral tests included limb-use scoring (Figure 3C (i)) and ipsilateral weight-bearing (Figure 3C  
303        (ii)).

304

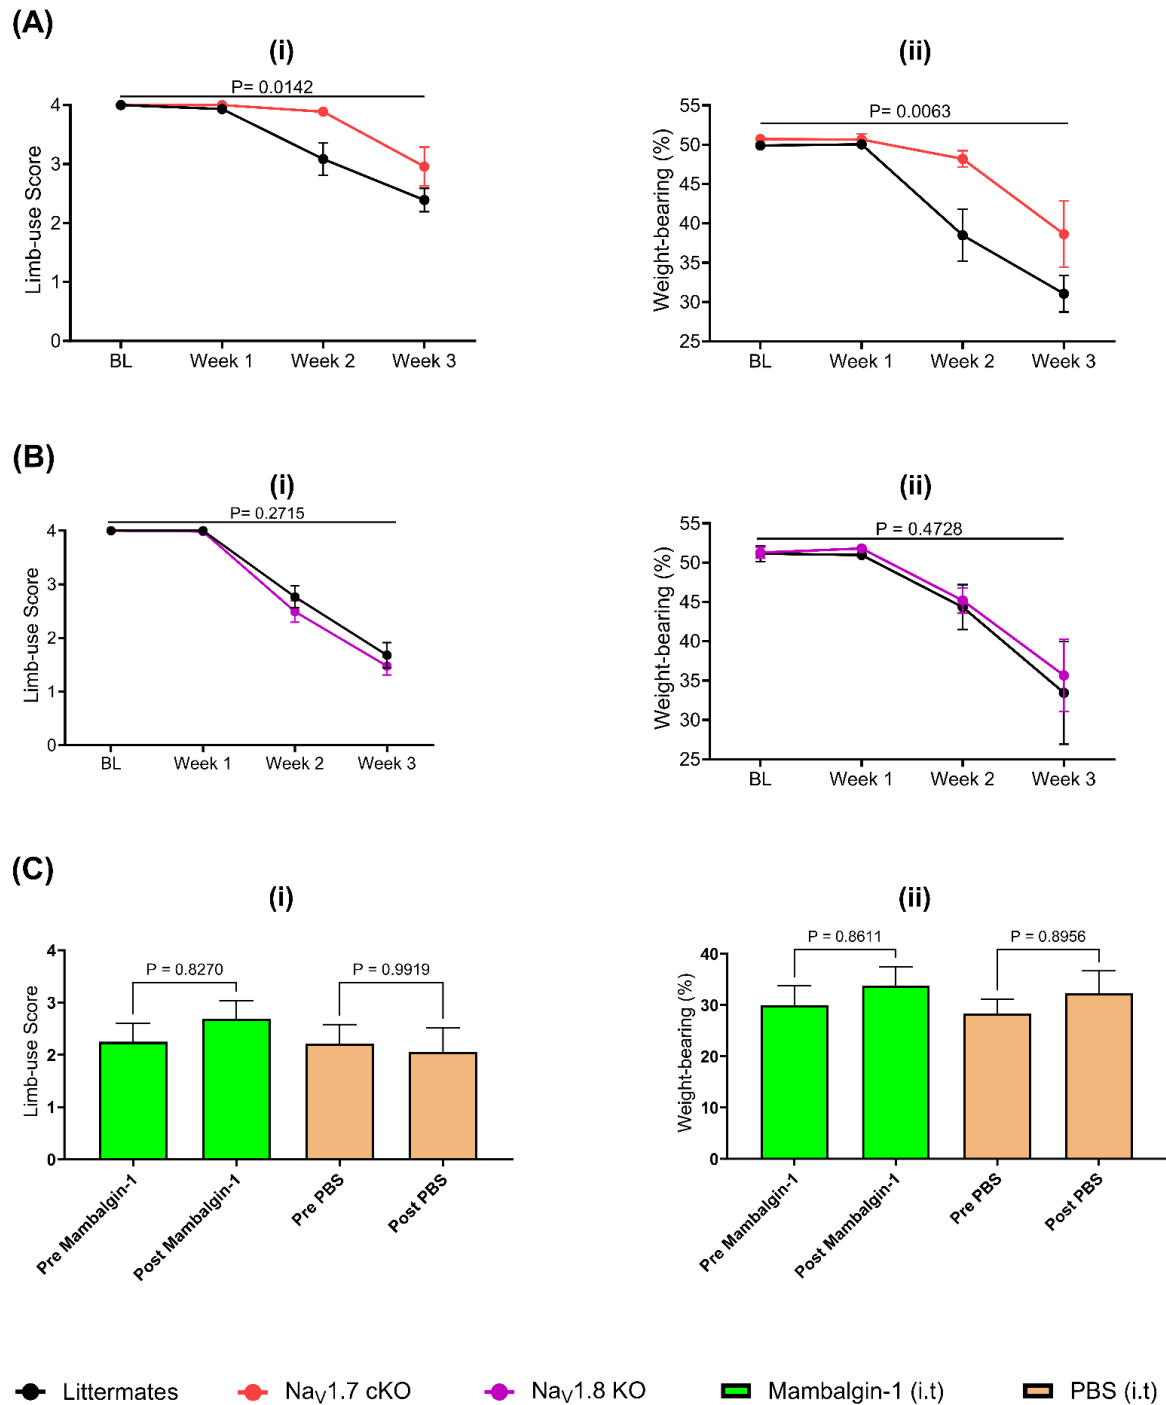

305

306

307

**Figure 3: An investigation of the potential significance of  $Na_v1.7$  channels,  $Na_v1.8$  channels, and acid-sensing ion channels as targets to treat CIBP.**

308

309

310

311

312

313

314

315

**A) Conditional  $Na_v1.7$  knockout mice in the DRGs showed a modest reduction in pain phenotype associated with CIBP.** (A (i)) A comparison of the limb-use scores between the conditional  $Na_v1.7$  knockout mice ( $Na_v1.7$  cKO) and their littermates in the CIBP model. Results indicate that the decline in the use of the affected limb in the  $Na_v1.7$  cKO mice was significantly slower than that of the control group (the REML,  $p$ -value=0.0142). (A (ii)) Ipsilateral weight-bearing after the CIBP surgery in  $Na_v1.7$  cKO mice and their littermates. The REML analysis revealed that the difference in the weight-bearing between the two groups was statistically significant ( $p$ -value=0.0063), with the  $Na_v1.7$  conditional knockout mice showing a significantly less reduction in the percentage of weight put on the ipsilateral

316 *limb over time compared to their littermates. N=9 in the Na<sub>v</sub>1.7 cKO group (five females and four*  
317 *males) and 14 for their littermates (seven males and seven females).*

318 ***B) Knocking out the expression of Na<sub>v</sub>1.8 channels congenitally did not cause a statistically***  
319 ***significant alteration in the pain phenotype associated with CIBP when assessed using limb-use***  
320 ***score (B (i)) and weight-bearing (B (ii)). N=8 for littermates (two males and six females) and 12 for***  
321 ***Na<sub>v</sub>1.8 knockout mice (Na<sub>v</sub>1.8 KO, six males and six females).***

322 ***C) The intrathecal administration of mambalgin-1 (34 μM) did not alter the limb-use score (C (i)) or***  
323 ***weight-bearing of mice with CIBP significantly (C (ii)). Behavioral tests were performed 30 minutes***  
324 ***after mambalgin-1 or phosphate-buffered saline (PBS) administration. N=10 for the mambalgin-1***  
325 ***group (five males and five females) and eight for the PBS group (four males and four females).***

326 *For Figures A and B, data were analyzed using REML analysis, while for Figure C, data were analyzed*  
327 *using the One-way ANOVA test with multiple comparisons.*

### 328 4.3 Neuronal Silencing in CIBP

329 Intrathecal Derm-BOT did not cause a significant alteration in pain-like behavior after  
330 CIBP

331 For this study, mice underwent the CIBP surgery, and whenever a mouse reached limb-use score 3, it  
332 was injected intrathecally with a modified botulinum compound that specifically inhibits  
333 neurotransmission in the μ opioid receptor-expressing neurons (Derm-BOT). The control group for this  
334 study involved the use of a botulinum compound that cannot enter cells due to the absence of opioid  
335 targeting moiety, and this was also injected upon reaching limb-use score 3. The comparison between  
336 the two treatment groups highlighted no significant difference in the limb-use score (Figure 4A (i)) or  
337 weight-bearing (Figure 4A (ii)). To test whether opioids reduce pain-like behavior in this model,  
338 morphine (15 mg/kg) was administered subcutaneously to mice when they reached limb-use score 3,  
339 and results indicated that morphine improved their limb-use scores (Figure 4B (i)) and ipsilateral  
340 weight-bearing (Figure 4B (ii)), bringing them to normal levels. Similarly, we conducted a pilot study to  
341 assess whether the intrathecal injection of 60 ng of morphine could reduce pain-like behavior in this  
342 model and the results indicated that morphine improved the limb-use score (Figure 4C (i)) and weight-  
343 bearing of mice with CIBP (Figure 4C (ii)). It is noteworthy that morphine was administered when mice  
344 reached limb-use score 3, which is the same time point used for the Derm-BOT administration.

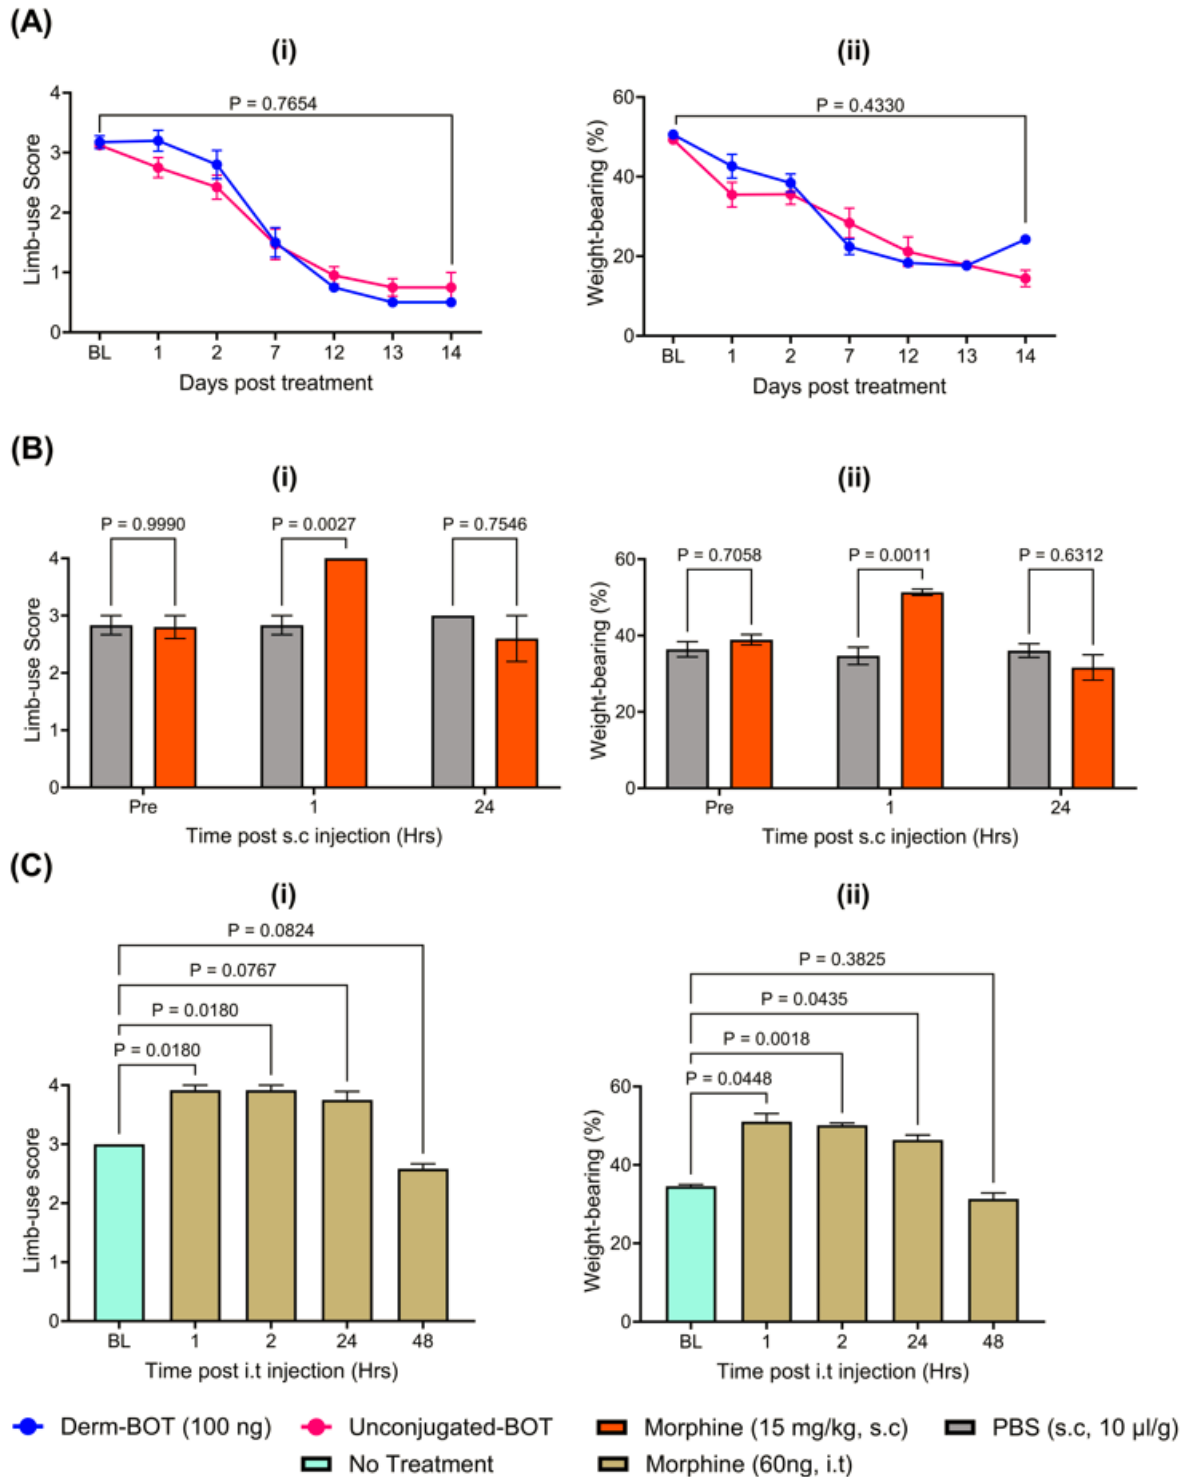

345

346 **Figure 4: Attempts to silence  $\mu$ -opioid receptor-expressing neurons in the spinal cord using**  
 347 **modified botulinum compounds failed to reduce pain-like behavior in a mouse model of CIBP.**  
 348 **Intrathecal and subcutaneous morphine administration resulted in significant analgesia.**

349 *A) Modified botulinum compounds to silence the  $\mu$ -opioid receptor-expressing neurons failed to*  
 350 *reduce pain-like behavior in our mouse model of CIBP. Mice were assessed for recovery from surgery*  
 351 *on day 7 after the surgery by measuring the limb-use score (shown as BL on graph (i)) and no mice*  
 352 *showed signs of limping on that day. After that, the limb-use was scored daily using the standard*  
 353 *limb-use scoring system. If a mouse reached limb-use score 3 (slight limping), it was injected*

354 *intrathecally with either 100 ng of dermorphine botulinum (Derm-BOT, shown in blue) or the molar-*  
355 *equivalent amount of the control (un-conjugated BOT lacking dermorphine, shown in pink). Following*  
356 *the intrathecal treatment, several behavioral tests were performed, including the limb-use score (i)*  
357 *and the static weight-bearing (ii) tests. (A (i)) The comparison of the average limb-use score between*  
358 *the two treatment groups over time highlighted no significant difference between the two groups*  
359 *when assessed using the REML analyses (p-value for the treatment effect was 0.7654). (A (ii)) The*  
360 *comparison of the average percentage of the weight-borne on the affected limb between the two*  
361 *treatment groups over time indicated no significant difference between them when assessed using*  
362 *the REML analyses (p-value for the treatment effect was 0.4330). n=10 for each group at the baseline*  
363 *(five males and five females).*

364 *B) Subcutaneous morphine (15 mg/kg) improved limb-use scores (i) and weight-bearing (ii) of mice*  
365 *with CIBP. Morphine was administered when mice reached limb-use score 3. Results were analyzed*  
366 *using repeated-measures one-way ANOVA test with multiple comparisons. N=5 (three males and two*  
367 *females) for the morphine group and six for the PBS group (three males and three females).*

368 *C) Intrathecal morphine improved limb-use scores (i) and weight-bearing (ii) of mice with CIBP.*  
369 *Morphine was administered intrathecally at a dose of 60ng per mouse when mice reached limb-use*  
370 *score 3. Results were analyzed using repeated-measures one-way ANOVA test with multiple*  
371 *comparisons. N=3 (two males and one female). P-values for the one-way ANOVA tests are 0.0002 for*  
372 *the limb-use score test and 0.0083 for the weight-bearing test. The p-values for the multiple*  
373 *comparisons are shown in the figure.*

#### 374 4.4 Dual targeting of NGF and TNF $\alpha$ in CIBP

##### 375 4.4.1 The simultaneous inhibition of NGF and TNF $\alpha$ increased the median time needed 376 to reach limb-use score zero after CIBP

377 As NGF and TNF $\alpha$  play essential roles in CIBP, we investigated whether blocking these two tumor-  
378 derived products could reduce the pain phenotype in our mouse model of CIBP (Figure 5). Etanercept  
379 (10 mg/kg) and MEDI578 (3mg/kg) were used to inhibit TNF $\alpha$  and NGF, respectively. The synergy  
380 between MEDI578 and Etanercept was evident as the combination was the only treatment option that  
381 resulted in a significant increase in median time needed to reach limb-use score zero after CIBP,  
382 compared to the control group (Figure 5A), with the median time needed to reach limb-use score zero  
383 in the control group being 12 days after treatment and 17 days in the combination-treated group. The  
384 median time needed to reach limb-use score zero in the etanercept-treated group was 13 days after  
385 the surgery, while that of the MEDI578-treated group was 15 days. Notably, these biologics were  
386 administered on day 10 after CIBP surgery via intraperitoneal injection. Behavioral differences are not  
387 thought to be driven by structural differences at the bone level because  $\mu$ CT analyses indicated that  
388 bone destruction was similar between treatment groups at the endpoint.

##### 389 4.4.2 Inhibiting NGF and/or TNF $\alpha$ slowed down the reduction of the use of the cancer- 390 bearing limb and the weight-bearing behavior

391 The administration of Etanercept and/or MEDI578 reduced the pain-like behaviors associated with  
392 CIBP (weight-bearing (Figure 5B) and limb-use score (Figure 5C)) compared to the control group. The  
393 co-administration of MEDI578 and Etanercept always resulted in a more profound reduction in the  
394 pain phenotype compared to each treatment separately. This improvement was statistically significant  
395 compared to Etanercept alone in the weight-bearing test (p-value= 0.0098, REML, Figure 5B).

##### 396 4.4.3 Secondary cutaneous heat hypersensitivity is prevented by the co-administration 397 of MEDI578 and Etanercept

398 The administration of Etanercept (a protein that inhibits TNF) and/or MEDI578 (anti-NGF) reduced  
399 secondary cutaneous heat sensitivity (Figure 5D) significantly compared to the control group when  
400 tested using the Hargreaves' test. The combination treatment reduced the secondary cutaneous heat

401 sensitivity to the extent that it reached statistical significance compared to Etanercept alone ( $p$ -value=  
 402 0.0097, REML). While the performance of MEDI578 was remarkable compared to the negative control  
 403 and etanercept alone, it was still less effective than the combination treatment, as there had been a  
 404 consistent trend of improved performance in the group treated with the combination. The superiority  
 405 of the combination treatment compared to the use of MEDI578 alone was convincing in the  
 406 Hargreaves' test, with the REML analysis showing a  $p$ -value of 0.0137 when the two groups are  
 407 compared.

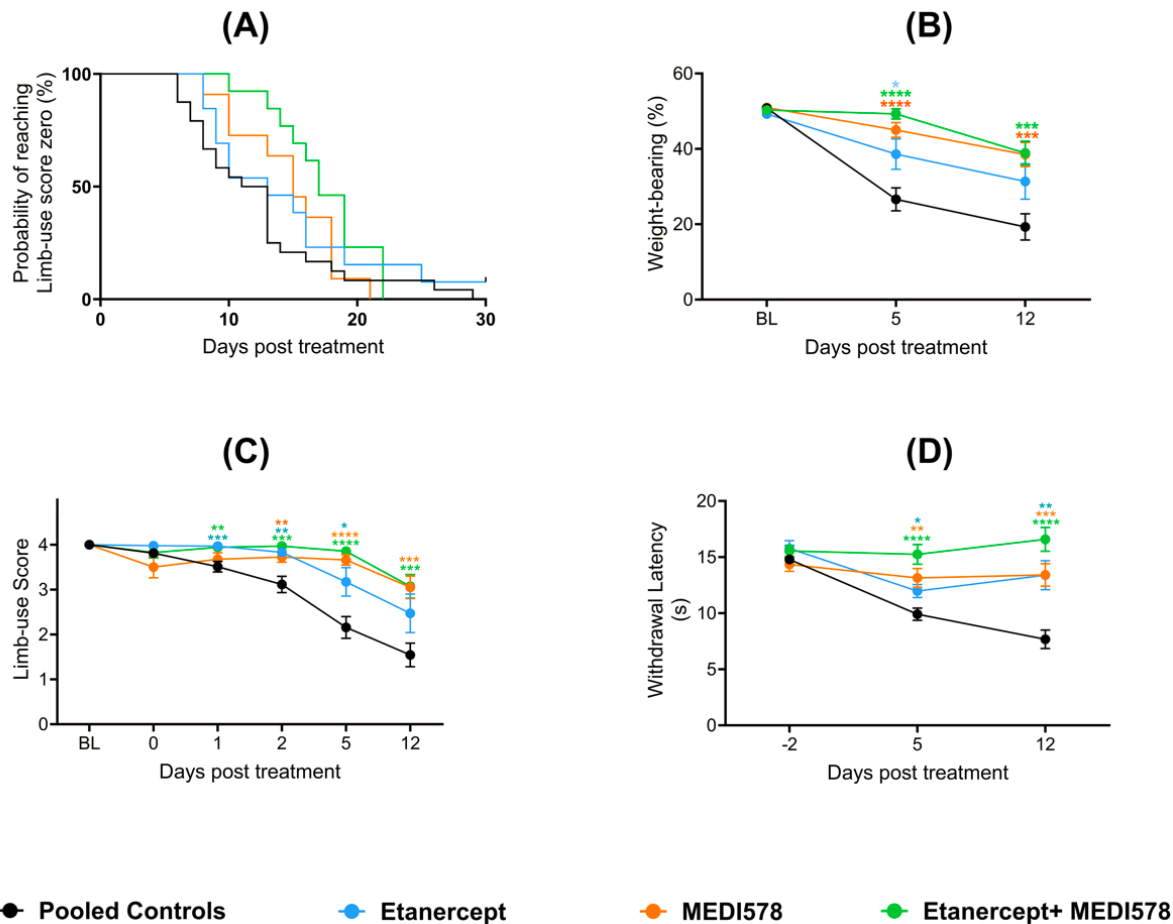

408

409 **Figure 5: The dual inhibition of NGF and TNF $\alpha$  reduced heat hypersensitivity and pain-like**  
 410 **behaviors associated with CIBP.**

411 **A) Dual treatment using Etanercept and MEDI578 significantly increased the time needed to reach**  
 412 **limb-use score zero of mice after CIBP surgery.** The median time needed to reach limb-use score zero  
 413 for the mice that received anti-NGF (MEDI578) + Etanercept (a protein that inhibits the binding of  
 414 TNF to its receptors) was 17 days after treatment, while it was 12 days for the control group ((Gehan-  
 415 Breslow-Wilcoxon test ( $p$ -value= 0.0026) and Log-rank Mantel-Cox test ( $p$ -value= 0.0357)).

416 **B) Antagonising the effects of NGF, TNF, or both slowed down the reduction in the weight put on**  
 417 **the ipsilateral limb after CIBP.** Compared to the control group, the etanercept-treated group had  
 418 significantly higher mean weight-bearing results (the REML, 0.0113). Similarly, the mice treated with  
 419 MEDI578 showed a significantly smaller drop in the weight-bearing (the REML,  $p$ -value<0.0001). The  
 420 combination of MEDI578 and Etanercept also had a higher fraction of weight put on the ipsilateral  
 421 limb compared to the controls ( $p$ -value=<0.0001). Mice treated with the combination of Etanercept  
 422 and MEDI578 had a statistically significant higher weight-bearing performance than the ones treated

423 *with Etanercept alone (p-value=0.0098, the REML), but not compared to the mice treated with*  
424 *MEDI578 alone (p-value= 0.4159).*

425 **C) Blocking the binding of NGF, TNF, or both to their receptors slowed down the reduction in the**  
426 **limb-use score associated with CIBP.** *Compared to the control group, the etanercept-treated group*  
427 *had a significantly higher mean limb-use score (the REML, p-value= 0.0024). Similarly, mice treated*  
428 *with MEDI578 showed better mean limb-use scores compared to control mice (the REML, p-value=*  
429 *0.0029). The combination of MEDI578 and Etanercept also led to mice having better use of the*  
430 *affected limb compared to the controls (p-value<0.0001). Mice treated with Etanercept and MEDI578*  
431 *did not significantly improve the limb-use score statistically compared to those treated with MEDI578*  
432 *alone (p-value= 0.1673, the mixed-effects model) or Etanercept alone (p-value= 0.0693).*

433 **D) The concurrent application of MEDI578 and Etanercept prevented the development of secondary**  
434 **cutaneous heat hyperalgesia associated with CIBP.** *The application of MEDI578 significantly*  
435 *diminished heat hyperalgesia associated with CIBP compared to the control group (p-value <0.0001).*  
436 *Similarly, Etanercept significantly lessened heat hyperalgesia associated with CIBP compared to the*  
437 *control group (p-value <0.0001). The simultaneous application of MEDI578 and Etanercept prevented*  
438 *the development of secondary cutaneous heat hyperalgesia entirely and had a significantly improved*  
439 *effect compared to Etanercept alone (p-value= 0.0097) and MEDI578 alone (p-value= 0.0137).*

440 *The asterisks of significance shown in the figure represent the post hoc analysis results comparing*  
441 *each treatment with the control group at each time point. n=13 in each group at the baseline (except*  
442 *for the control group (n=23)). Doses: Etanercept (10mg/kg), MEDI578 (3mg/kg), and control antibody*  
443 *(3mg/kg). The drugs were injected intraperitoneally on day ten post-surgery. Control antibody (n=10,*  
444 *five males and five females), PBS (n=13, six males and seven females), MEDI578 (n=13, six females*  
445 *and seven males), etanercept (n=13, six males and seven females), and the combination (n=13, six*  
446 *females and seven males).*

## 447 5. Discussion

### 448 5.1 Single ion channel targets

449 The aim of this work was to identify targets for treating CIBP. Previous work from our lab and other  
450 labs reported potential treatment strategies for CIBP using mouse models (see Table 1). In this  
451 report, a mouse model of CIBP was optimized. This model involves the injection of  $\sim 2 \times 10^4$  Lewis Lung  
452 Carcinoma cells into the intramedullary space of the femur of C57BL/6 mice or transgenic mice on  
453 the C57BL/6 background. Static weight bearing and limb use score are both observed to decrease  
454 gradually as the model progresses (Figure 1). Previous work relied on injecting  $2 \times 10^5$  LL/2 cells in the  
455 femur, which allows mice to be studied for less than 20 days after surgery. When this model was  
456 employed by our lab to test whether knocking out Nav1.7 channels conditionally using Wnt-Cre could  
457 reduce pain associated with CIBP, results indicated a tendency for improved limb use in the Nav1.7  
458 conditional knockout (Nav1.7<sup>Wnt1</sup>) mice compared to their littermates but without statistical  
459 significance (53). One potential reason for this could be that the CIBP model used was aggressive and  
460 did not allow a long enough pain window to assess the difference between groups. What further  
461 reinforces this hypothesis is our findings reported here, employing the refined model which involves  
462 injection of  $2 \times 10^4$  LL/2 cells (Figure 1). Here, we report modest but significant analgesia in the  
463 conditional Nav1.7 knockout group (Nav1.7<sup>Adv</sup>), indicating that Nav1.7 could be playing a role in CIBP  
464 (Figure 3A). With this model, we could observe mice for more than 30 days after surgery, which gave  
465 us a longer time to assess the analgesic potential of the therapeutic targets (Figure 1).

466 **Table 1:** Examples of studies reporting a significant reduction in pain-like behavior/hyperalgesia in  
467 mouse models of CIBP.

| <b>Analgesic target/strategy</b>                                                                                | <b>Cancer cells</b>           | <b>Behavioural tests</b>                                          | <b>References</b> |
|-----------------------------------------------------------------------------------------------------------------|-------------------------------|-------------------------------------------------------------------|-------------------|
| <b>Ablation/Silencing Nav1.8+ neurons using chemogenetic tools</b>                                              | LL/2 (lung cancer)            | Static weight bearing                                             | (21)              |
| <b>Anti-programmed cell death-1 (anti-PD-1) monoclonal antibody</b>                                             | LL/2, LL/2-Luc2, CMT 167      | Mechanical, thermal and cold sensitivity                          | (54)              |
| <b>Pharmacologic inhibition of ferroptosis</b>                                                                  | LL2-Luc                       | Mechanical and thermal sensitivity and spontaneous pain behaviour | (55)              |
|                                                                                                                 |                               |                                                                   |                   |
| <b>Melatonin evoked analgesia via sirtuin 1 (SIRT1)-dependent nucleus-high mobility group box-1 inhibition</b>  | LL/2                          | Mechanical and thermal sensitivity                                | (56)              |
| <b>Inhibition of Wnt5b signalling using anti-Ryk antibodies</b>                                                 | NCTC2472 (osteosarcoma)       | Mechanical and thermal sensitivity                                | (57)              |
| <b>Blockade of spinal vascular endothelial growth factor A signalling using antibodies or receptor blockers</b> | LL/2                          | Mechanical and thermal sensitivity                                | (58)              |
| <b>miR-9-5p modified mouse bone marrow mesenchymal stem cell mediated analgesic actions</b>                     | NCTC                          | Spontaneous pain behaviour and mechanical sensitivity             | (59)              |
| <b>Srt 1720 activation of Sirtuin 1 relieves bone cancer pain</b>                                               | NCTC2472                      | Spontaneous pain behaviour and mechanical sensitivity             | (60)              |
| <b>Phosphatidylinositol 3-kinase (PI3K)-protein kinase B (Akt) inhibition</b>                                   | Mouse 4T1 breast cancer cells | Mechanical sensitivity                                            | (61)              |
| <b>Opioids</b>                                                                                                  | NCTC 2472                     | Spontaneous lifting behaviour and Limb-use on rotarod             | (62)              |
| <b>Antibodies against nerve growth factor</b>                                                                   | Canine prostate carcinoma     | Ongoing nocifensive behaviors, mechanical                         | (63)              |



|                                                  |          |                                                                                             |      |
|--------------------------------------------------|----------|---------------------------------------------------------------------------------------------|------|
|                                                  |          | and thermal sensitivity                                                                     |      |
| <b>Osteoprotegerin block of bone destruction</b> | NCTC2472 | Forced ambulatory guarding, limb-use score, spontaneous flinches and mechanical sensitivity | (64) |

468

469 Using the ‘refined cancer model’ we moved on to assessing more molecular targets. The second target  
470 tested was Nav1.8. Nav1.8 represents an appealing analgesic target, and several groups showed its  
471 role in inflammatory and neuropathic pain, and channel blockers were promising in phase II clinical  
472 trials in patients with painful diabetic peripheral neuropathy (65). Additionally, our previous work  
473 demonstrated that ablating/silencing Nav1.8+ neurons reduced CIBP. While data from channel  
474 knockdown studies on rats relying on the injection of Walker 256 breast tumor cells suggest that  
475 Nav1.8 could contribute to CIBP (23), knocking out Nav1.8 channels in mice did not lead to a significant  
476 change in CIBP compared to their littermates in our model (Figure 3B). The discrepancy in results could  
477 be due to species differences or compensatory mechanisms caused by congenital channel deletion as  
478 opposed to channel knockdown. To rule out the possibility of compensatory mechanisms, future work  
479 should look at knocking out the channel expression in adulthood.

480 The third target/s tested here focused on acid-sensing ion channels using mambalgins-1. While  
481 mambalgins block all acid-sensing ion channel combinations expressed in central neurons and  
482 nociceptors, we report these experiments as part of the single ion channel targets section as acid-  
483 sensing ion channels are not the sole acid sensors in the body. Therefore, blocking them is still  
484 subject to compensation by other targets, like TRPV1 channels, and in fact, the involvement of TRPV1  
485 in sensing bone cancer-derived acidosis has been previously shown (3). What made mambalgins of  
486 great interest to us were *in vivo* mouse experiments that highlighted how significant analgesia is seen  
487 when mambalgins are administered (25). Because acidosis was suggested as a pain-causing  
488 mechanism in CIBP, we attempted to use mambalgins-1 as a potential analgesic in our mouse model  
489 of CIBP. Unfortunately, intrathecal mambalgins-1 (34 $\mu$ M) did not improve limb-use score or weight-  
490 bearing of mice with CIBP (Figure 3C). This could be attributable to the redundancy in pain pathways  
491 where blocking a single target can be easily compensated for by other targets. Because none of the  
492 single ion channel targets tested here seemed promising enough for therapeutic application, we  
493 decided to adopt broader analgesic approaches in our subsequent experiments, namely cell silencing  
494 and dual-targeting.

## 495 5.2 Cell silencing

496 While silencing  $\mu$ -opioid receptor-expressing neurons using Derm-BOT could be a promising analgesic  
497 option that lessens problems associated with the intrathecal or systemic administration of opioid  
498 agonists (66), this approach failed to cause noticeable changes in the pain-like behavior in our mouse  
499 model of CIBP (Figure 4A). One limitation of our work is that it does not provide evidence for  
500 silencing  $\mu$ -opioid receptor+ neurons by Derm-BOT, but our behavioral results clearly indicate that  
501 Derm-BOT did not cause any noticeable analgesic effects. Problems related to the target itself are  
502 unlikely because the subcutaneous (Figure 4B) and intrathecal (Figure 4C) administration of  
503 morphine caused analgesia. Because opioids resulted in a substantial analgesic effect in this work,  
504 one could attempt to use different doses of Derm-BOT to determine if another dose is needed to  
505 achieve a substantial lasting reduction in pain-like behavior. The dose used here was previously

506 shown to reduce pain in various inflammatory and neuropathic models (32), but perhaps a different  
507 dose is needed to effect behavioral changes in CIBP.

### 508 5.3 Dual targeting of tumor-derived products

509 The hypothesis behind the inhibition of NGF is backed up by previous findings, which indicate that in  
510 CIBP, inhibiting NGF actions reduces neuromas (67), prevents central sensitization (68), and reduces  
511 the NGF-mediated neurotransmitters and ion channel expression elevation. Also, this target is  
512 validated by human genetics as loss of function mutations in the receptor TrkA are linked to pain  
513 insensitivity (69). More importantly, tanezumab (an anti-NGF antibody) resulted in a significant  
514 analgesic effect in clinical trials on patients with CIBP (36). Additionally, previous work from our lab  
515 found that >70% of bone afferents retrogradely labeled by injecting Fast Blue in the femur of C57BL/6  
516 are Nav1.8+. Approximately 90% of Fast Blue+ Nav1.8+ neurons expressed TrkA receptors (70). On the  
517 other hand, inhibiting the binding of TNF to its receptor carries countless benefits in CIBP (71), like the  
518 prevention of secondary cutaneous heat and mechanical sensitivity.

519 The results indicate that this combination, unlike targeting a sole mediator (i.e. TNF or NGF),  
520 significantly increased the time needed to reach limb-use score zero after the CIBP surgery in C57BL/6  
521 mice. Mice treated with etanercept and MEDI578 concurrently demonstrated significantly less pain-  
522 like behavior. Also, the combination-treated mice had significantly less secondary cutaneous heat  
523 hypersensitivity compared to those treated with MEDI578 or etanercept alone. It is worth highlighting  
524 the impressive phenotype achieved by using MEDI578 alone. This should not come as a surprise, given  
525 how previous work indicated the involvement of Nav1.8+ neurons in CIBP (21) and that more than  
526 90% of bone afferents that are positive for Nav1.8 are also positive for TrkA (70). While these findings,  
527 coupled with the promising clinical trial results investigating the use of tanezumab in CIBP patients  
528 (36), suggest that targeting TrkA alone is an appealing method to treat CIBP, concerns related to the  
529 safety of using large doses of tanezumab remain compelling (72), especially because clinical trials  
530 indicated that doses needed for CIBP are significantly higher than those needed for osteoarthritis pain.  
531 The analgesic effects seen with MEDI578 could reignite the debate about the utility of single molecular  
532 targets for complex conditions. While it is evident that MEDI578 analgesic effects were remarkable,  
533 one could argue that when TrkA is activated/inhibited many downstream pathways/molecular targets  
534 are affected. Investigating the potential synergy between inhibiting NGF and TNF simultaneously  
535 would be beneficial not only from an efficacy point of view, but also, perhaps more importantly, from  
536 a safety viewpoint. To the best of our knowledge, this is the first study that assessed the analgesic  
537 efficacy of targeting NGF and TNF simultaneously in CIBP, but further work is needed to investigate  
538 the potential synergy. One option would be to test whether the coadministration of sub-eficacious  
539 doses of MEDI578 and etanercept could result in a significant analgesic effect in CIBP.

540

541 In conclusion, this work optimized a mouse model of CIBP by selecting an appropriate number of  
542 Lewis lung carcinoma cells for intra-femoral inoculation. Following that, various single ion channel  
543 targets were tested to investigate potential analgesic effects, namely Nav1.7 channels, Nav1.8  
544 channels, and acid-sensing ion channels. While deleting Nav1.7 channels in sensory neurons showed  
545 a statistically significant reduction in pain-like behavior, the effect was only modest, especially when  
546 compared to the standard of care (i.e. opioids). These findings do not come as a surprise because  
547 drugs to treat pathologies of redundant biological systems often exhibit a high attrition rate in the  
548 clinic, mainly because the inhibition of one target can be easily compensated for by other targets.  
549 While our model indicates that opioids, when administered intrathecally or subcutaneously, reduce  
550 pain-like behavior significantly, clinical data indicate their long-term use is associated with severe  
551 side effects, like tolerance, dependence, and respiratory depression. Preclinical CIBP models also  
552 suggested that sustained morphine accelerates sarcoma-induced bone pain, bone loss, and  
553 spontaneous fracture. Therefore, there is a pressing need to find alternative analgesic tools that are  
554 not only effective but also safe in the long term. Such novel analgesics are unlikely to be reliant on

555 single ion channel targets given the system redundancy and the complexity of the condition.  
556 Therefore, more generalized analgesic approaches are needed. Herein, we tested two approaches:  
557 silencing  $\mu$ -opioid positive neurons in the spinal cord and using MEDI578 (to inhibit nerve growth  
558 factor) and Etanercept (to inhibit the tumor necrosis factor) simultaneously. While cell silencing did  
559 not show a good analgesic effect in our hands with the doses tested in this report, the simultaneous  
560 use of etanercept and MEDI578 resulted in an impressive reduction in the pain phenotype associated  
561 with CIBP and prevented the development of secondary cutaneous heat hyperalgesia. The analgesic  
562 potential of the combination of etanercept and MEDI578 was convincingly superior to the use of  
563 etanercept or MEDI578 alone. These findings, thus, open the door for the use of bispecific antibodies  
564 targeting these two mediators or low doses of each one of the two biologics to effect analgesia in  
565 patients living with CIBP.

## 566 Conflict of Interest

567 FW and IC are employed by AstraZeneca UK.

## 568 Author contributions

569 Conceptualization: RH, JJC, SS, JW

570 Methodology: RH, SG, FI, AF, SC, MA

571 Investigation: RH, SG, FI, AF, SC, MA

572 Funding acquisition: JW, SS

573 Project administration: SG, JW

574 Supervision: RH, FW, IC, JJC, SS, JW

575 Writing – original draft: RH, JW

## 576 Funding

577 This work was funded by European Commission's Horizon 2020 Research and Innovation  
578 Programme, Marie Skłodowska-Curie grant (814244) and Cancer Research UK (185341).

## 579 Acknowledgment

580 We would like to thank Professor Bazbek Davletov for providing Derm-BOT and its control. We would  
581 also like to thank Dr Iain Chessell and Dr Fraser Welsh for their kind donation of MEDI578 (and its  
582 control) and etanercept.

## 583 References

- 584 1. Chin H, Kim J. Bone Metastasis: Concise Overview. *Fed Pract.* 2015;32(2):24-30.
- 585 2. Coleman RE. Metastatic bone disease: clinical features, pathophysiology and treatment  
586 strategies. *Cancer Treatment Reviews.* 2001;27(3):165-76.
- 587 3. Haroun R, Wood JN, Sikandar S. Mechanisms of cancer pain. *Frontiers in Pain Research.*  
588 2023;3.
- 589 4. Qiu F, Jiang Y, Zhang H, Liu Y, Mi W. Increased expression of tetrodotoxin-resistant sodium  
590 channels Nav1.8 and Nav1.9 within dorsal root ganglia in a rat model of bone cancer pain. *Neurosci*  
591 *Lett.* 2012;512(2):61-6.
- 592 5. Zhou Z, Davar G, Strichartz G. Endothelin-1 (ET-1) selectively enhances the activation gating of  
593 slowly inactivating tetrodotoxin-resistant sodium currents in rat sensory neurons: a mechanism for the  
594 pain-inducing actions of ET-1. *J Neurosci.* 2002;22(15):6325-30.

- 595 6. Jin X, Gereau RWt. Acute p38-mediated modulation of tetrodotoxin-resistant sodium channels  
596 in mouse sensory neurons by tumor necrosis factor- $\alpha$ . *The Journal of neuroscience : the official*  
597 *journal of the Society for Neuroscience*. 2006;26(1):246-55.
- 598 7. Gold MS, Levine JD, Correa AM. Modulation of TTX-R INa by PKC and PKA and their role in  
599 PGE2-induced sensitization of rat sensory neurons in vitro. *J Neurosci*. 1998;18(24):10345-55.
- 600 8. Gould HJ, 3rd, Gould TN, England JD, Paul D, Liu ZP, Levinson SR. A possible role for nerve  
601 growth factor in the augmentation of sodium channels in models of chronic pain. *Brain Res*.  
602 2000;854(1-2):19-29.
- 603 9. Laedermann CJ, Abriel H, Decosterd I. Post-translational modifications of voltage-gated  
604 sodium channels in chronic pain syndromes. *Frontiers in Pharmacology*. 2015;6.
- 605 10. Stamboulian S, Choi JS, Ahn HS, Chang YW, Tyrrell L, Black JA, et al. ERK1/2 mitogen-activated  
606 protein kinase phosphorylates sodium channel Na(v)1.7 and alters its gating properties. *J Neurosci*.  
607 2010;30(5):1637-47.
- 608 11. Cox JJ, Reimann F, Nicholas AK, Thornton G, Roberts E, Springell K, et al. An SCN9A  
609 channelopathy causes congenital inability to experience pain. *Nature*. 2006;444(7121):894-8.
- 610 12. Bennett DL, Woods CG. Painful and painless channelopathies. *Lancet Neurol*. 2014;13(6):587-  
611 99.
- 612 13. Fertleman CR, Baker MD, Parker KA, Moffatt S, Elmslie FV, Abrahamsen B, et al. SCN9A  
613 mutations in paroxysmal extreme pain disorder: allelic variants underlie distinct channel defects and  
614 phenotypes. *Neuron*. 2006;52(5):767-74.
- 615 14. Nassar MA, Stirling LC, Forlani G, Baker MD, Matthews EA, Dickenson AH, et al. Nociceptor-  
616 specific gene deletion reveals a major role for Nav1.7 (PN1) in acute and inflammatory pain.  
617 *Proceedings of the National Academy of Sciences*. 2004;101(34):12706-11.
- 618 15. Nassar MA, Stirling LC, Forlani G, Baker MD, Matthews EA, Dickenson AH, et al. Nociceptor-  
619 specific gene deletion reveals a major role for Nav1.7 (PN1) in acute and inflammatory pain. *Proc Natl*  
620 *Acad Sci U S A*. 2004;101(34):12706-11.
- 621 16. Minett MS, Nassar MA, Clark AK, Passmore G, Dickenson AH, Wang F, et al. Distinct Nav1.7-  
622 dependent pain sensations require different sets of sensory and sympathetic neurons. *Nat Commun*.  
623 2012;3:791.
- 624 17. Akopian AN, Souslova V, England S, Okuse K, Ogata N, Ure J, et al. The tetrodotoxin-resistant  
625 sodium channel SNS has a specialized function in pain pathways. *Nat Neurosci*. 1999;2(6):541-8.
- 626 18. Gold MS, Weinreich D, Kim CS, Wang R, Treanor J, Porreca F, et al. Redistribution of Na(V)1.8  
627 in uninjured axons enables neuropathic pain. *J Neurosci*. 2003;23(1):158-66.
- 628 19. Zhang XF, Zhu CZ, Thimmapaya R, Choi WS, Honore P, Scott VE, et al. Differential action  
629 potentials and firing patterns in injured and uninjured small dorsal root ganglion neurons after nerve  
630 injury. *Brain Res*. 2004;1009(1-2):147-58.
- 631 20. Roza C, Laird JM, Souslova V, Wood JN, Cervero F. The tetrodotoxin-resistant Na<sup>+</sup> channel  
632 Nav1.8 is essential for the expression of spontaneous activity in damaged sensory axons of mice. *J*  
633 *Physiol*. 2003;550(Pt 3):921-6.
- 634 21. Haroun R, Gossage SJ, Luiz AP, Arcangeletti M, Sikandar S, Zhao J, et al. Chemogenetic  
635 Silencing of Na(V)1.8-Positive Sensory Neurons Reverses Chronic Neuropathic and Bone Cancer Pain in  
636 FLE<sub>x</sub> PSAM(4)-GlyR Mice. *eNeuro*. 2023;10(9).
- 637 22. Liu XD, Yang JJ, Fang D, Cai J, Wan Y, Xing GG. Functional upregulation of nav1.8 sodium  
638 channels on the membrane of dorsal root Ganglia neurons contributes to the development of cancer-  
639 induced bone pain. *PLoS One*. 2014;9(12):e114623.
- 640 23. Miao X-R, Gao X-F, Wu J-X, Lu Z-J, Huang Z-X, Li X-Q, et al. Bilateral downregulation of Nav1.8  
641 in dorsal root ganglia of rats with bone cancer pain induced by inoculation with Walker 256 breast  
642 tumor cells. *BMC Cancer*. 2010;10(1):216.
- 643 24. Enomoto M, Mantyh PW, Murrell J, Innes JF, Lascelles BDX. Anti-nerve growth factor  
644 monoclonal antibodies for the control of pain in dogs and cats. *Veterinary Record*. 2019;184(1):23.

- 645 25. Diochot S, Baron A, Salinas M, Douguet D, Scarzello S, Dabert-Gay AS, et al. Black mamba  
646 venom peptides target acid-sensing ion channels to abolish pain. *Nature*. 2012;490(7421):552-5.  
647 26. Qin W, Li Y, Liu B, Liu Y, Zhang Y, Zhang X, et al. Intrathecal morphine infusion therapy via a  
648 percutaneous port for refractory cancer pain in china: an efficacy, safety and cost utilization analysis.  
649 *Journal of Pain Research*. 2020;13:231.  
650 27. King T, Vardanyan A, Majuta L, Melemedjian O, Nagle R, Cress AE, et al. Morphine treatment  
651 accelerates sarcoma-induced bone pain, bone loss, and spontaneous fracture in a murine model of  
652 bone cancer. *Pain*. 2007;132(1-2):154-68.  
653 28. Montal M. Botulinum neurotoxin: a marvel of protein design. *Annu Rev Biochem*.  
654 2010;79:591-617.  
655 29. Arsenault J, Ferrari E, Niranjana D, Cuijpers SA, Gu C, Vallis Y, et al. Stapling of the botulinum  
656 type A protease to growth factors and neuropeptides allows selective targeting of neuroendocrine  
657 cells. *J Neurochem*. 2013;126(2):223-33.  
658 30. Darios F, Niranjana D, Ferrari E, Zhang F, Soloviev M, Rummel A, et al. SNARE tagging allows  
659 stepwise assembly of a multimodular medicinal toxin. *Proc Natl Acad Sci U S A*. 2010;107(42):18197-  
660 201.  
661 31. Ferrari E, Maywood ES, Restani L, Caleo M, Pirazzini M, Rossetto O, et al. Re-assembled  
662 botulinum neurotoxin inhibits CNS functions without systemic toxicity. *Toxins (Basel)*. 2011;3(4):345-  
663 55.  
664 32. Maiarù M, Leese C, Certo M, Echeverria-Altuna I, Mangione AS, Arsenault J, et al. Selective  
665 neuronal silencing using synthetic botulinum molecules alleviates chronic pain in mice. *Science  
666 Translational Medicine*. 2018;10(450):eaar7384.  
667 33. Alexander RB, Ponniah S, Hasday J, Hebel JR. Elevated levels of proinflammatory cytokines in  
668 the semen of patients with chronic prostatitis/chronic pelvic pain syndrome. *Urology*. 1998;52(5):744-  
669 9.  
670 34. Kawabata A. Prostaglandin E2 and pain--an update. *Biol Pharm Bull*. 2011;34(8):1170-3.  
671 35. Nencini S, Ringuet M, Kim D-H, Chen Y-J, Greenhill C, Ivanusic JJ. Mechanisms of nerve growth  
672 factor signaling in bone nociceptors and in an animal model of inflammatory bone pain. *Molecular  
673 Pain*. 2017;13:1744806917697011.  
674 36. Fallon M, Sopata M, Dragon E, Brown MT, Viktrup L, West CR, et al. A Randomized Placebo-  
675 Controlled Trial of the Anti-Nerve Growth Factor Antibody Tanezumab in Subjects With Cancer Pain  
676 Due to Bone Metastasis. *The Oncologist*. 2023:oyad188.  
677 37. KG H, K K, MA S, TH L, JE S, JR G, et al. A Blocking Antibody to Nerve Growth Factor Attenuates  
678 Skeletal Pain Induced by Prostate Tumor Cells Growing in Bone. *Cancer research*. 2005;65(20).  
679 38. Jimenez-Andrade JM, Ghilardi JR, Castaneda-Corral G, Kuskowski MA, Mantyh PW. Preventive  
680 or late administration of anti-NGF therapy attenuates tumor-induced nerve sprouting, neuroma  
681 formation and cancer pain. *Pain*. 2011;152(11):2564-74.  
682 39. D B, GD I, J X, M R. Prospective Administration of Anti-Nerve Growth Factor Treatment  
683 Effectively Suppresses Functional Connectivity Alterations After Cancer-Induced Bone Pain in Mice.  
684 *Pain*. 2019;160(1).  
685 40. Tominaga M, Caterina MJ, Malmberg AB, Rosen TA, Gilbert H, Skinner K, et al. The cloned  
686 capsaicin receptor integrates multiple pain-producing stimuli. *Neuron*. 1998;21(3):531-43.  
687 41. Bhave G, Zhu W, Wang H, Brasier DJ, Oxford GS, Gereau RWt. cAMP-dependent protein kinase  
688 regulates desensitization of the capsaicin receptor (VR1) by direct phosphorylation. *Neuron*.  
689 2002;35(4):721-31.  
690 42. Ji RR, Samad TA, Jin SX, Schmolz R, Woolf CJ. p38 MAPK activation by NGF in primary sensory  
691 neurons after inflammation increases TRPV1 levels and maintains heat hyperalgesia. *Neuron*.  
692 2002;36(1):57-68.  
693 43. Davis JB, Gray J, Gunthorpe MJ, Hatcher JP, Davey PT, Overend P, et al. Vanilloid receptor-1 is  
694 essential for inflammatory thermal hyperalgesia. *Nature*. 2000;405(6783):183-7.

- 695 44. Chuang HH, Prescott ED, Kong H, Shields S, Jordt SE, Basbaum AI, et al. Bradykinin and nerve  
696 growth factor release the capsaicin receptor from PtdIns(4,5)P<sub>2</sub>-mediated inhibition. *Nature*.  
697 2001;411(6840):957-62.
- 698 45. Wacnik PW, Eikmeier LJ, Simone DA, Wilcox GL, Beitz AJ. Nociceptive characteristics of tumor  
699 necrosis factor- $\alpha$  in naive and tumor-bearing mice. *Neuroscience*. 2005;132(2):479-91.
- 700 46. Feige U, Hu YL, Gasser J, Campagnuolo G, Munyakazi L, Bolon B. Anti-interleukin-1 and anti-  
701 tumor necrosis factor-alpha synergistically inhibit adjuvant arthritis in Lewis rats. *Cell Mol Life Sci*.  
702 2000;57(10):1457-70.
- 703 47. Romas E, Gillespie MT, Martin TJ. Involvement of receptor activator of NFkappaB ligand and  
704 tumor necrosis factor-alpha in bone destruction in rheumatoid arthritis. *Bone*. 2002;30(2):340-6.
- 705 48. Zhou X, Wang L, Hasegawa H, Amin P, Han B-X, Kaneko S, et al. Deletion of PIK3C3/Vps34 in  
706 sensory neurons causes rapid neurodegeneration by disrupting the endosomal but not the autophagic  
707 pathway. *Proceedings of the National Academy of Sciences*. 2010;107(20):9424-9.
- 708 49. MacDonald DI, Sikandar S, Weiss J, Pyrski M, Luiz AP, Millet Q, et al. A central mechanism of  
709 analgesia in mice and humans lacking the sodium channel Na(V)1.7. *Neuron*. 2021;109(9):1497-  
710 512.e6.
- 711 50. MacDonald DI, Luiz AP, Iseppon F, Millet Q, Emery EC, Wood JN. Silent cold-sensing neurons  
712 contribute to cold allodynia in neuropathic pain. *Brain*. 2021;144(6):1711-26.
- 713 51. Hargreaves K, Dubner R, Brown F, Flores C, Joris J. A new and sensitive method for measuring  
714 thermal nociception in cutaneous hyperalgesia. *Pain*. 1988;32(1):77-88.
- 715 52. Zhang F, Wang Y, Liu Y, Han H, Zhang D, Fan X, et al. Transcriptional Regulation of Voltage-  
716 Gated Sodium Channels Contributes to GM-CSF-Induced Pain. *The Journal of Neuroscience*.  
717 2019;39(26):5222.
- 718 53. Minnett MS, Falk S, Santana-Varela S, Bogdanov YD, Nassar MA, Heegaard AM, et al. Pain  
719 without nociceptors? Nav1.7-independent pain mechanisms. *Cell Rep*. 2014;6(2):301-12.
- 720 54. Wang K, Gu Y, Liao Y, Bang S, Donnelly CR, Chen O, et al. PD-1 blockade inhibits osteoclast  
721 formation and murine bone cancer pain. *J Clin Invest*. 2020;130(7):3603-20.
- 722 55. Ding Z, Liang X, Wang J, Song Z, Guo Q, Schäfer MKE, et al. Inhibition of spinal ferroptosis-like  
723 cell death alleviates hyperalgesia and spontaneous pain in a mouse model of bone cancer pain. *Redox*  
724 *Biol*. 2023;62:102700.
- 725 56. Yang C, Kang F, Huang X, Zhang W, Wang S, Han M, et al. Melatonin attenuates bone cancer  
726 pain via the SIRT1/HMGB1 pathway. *Neuropharmacology*. 2022;220:109254.
- 727 57. He JJ, Wang X, Liang C, Yao X, Zhang ZS, Yang RH, et al. Wnt5b/Ryk-mediated membrane  
728 trafficking of P2X<sub>3</sub> receptors contributes to bone cancer pain. *Exp Neurol*. 2020;334:113482.
- 729 58. Fan LJ, Kan HM, Chen XT, Sun YY, Chen LP, Shen W. Vascular endothelial growth factor-  
730 A/vascular endothelial growth factor2 signaling in spinal neurons contributes to bone cancer pain. *Mol*  
731 *Pain*. 2022;18:17448069221075891.
- 732 59. Zhu C, Wang K, Chen Z, Han Y, Chen H, Li Q, et al. Antinociceptive effect of intrathecal injection  
733 of miR-9-5p modified mouse bone marrow mesenchymal stem cells on a mouse model of bone cancer  
734 pain. *J Neuroinflammation*. 2020;17(1):85.
- 735 60. Yang C, Huang X, Wang S, Han M, Kang F, Zhang Z, et al. Intrathecal administration of SRT1720  
736 relieves bone cancer pain by inhibiting the CREB/CRTC1 signalling pathway. *Neurosci Lett*.  
737 2020;715:134623.
- 738 61. Fu X, Zhang Y, Zhang R. Regulatory role of PI3K/Akt/WNK1 signal pathway in mouse model of  
739 bone cancer pain. *Sci Rep*. 2023;13(1):14321.
- 740 62. El Mouedden M, Meert TF. Evaluation of pain-related behavior, bone destruction and  
741 effectiveness of fentanyl, sufentanil, and morphine in a murine model of cancer pain. *Pharmacol*  
742 *Biochem Behav*. 2005;82(1):109-19.
- 743 63. Halvorson KG, Kubota K, Sevcik MA, Lindsay TH, Sotillo JE, Ghilardi JR, et al. A Blocking  
744 Antibody to Nerve Growth Factor Attenuates Skeletal Pain Induced by Prostate Tumor Cells Growing in  
745 Bone. *Cancer Research*. 2005;65(20):9426.

- 746 64. Honore P, Luger NM, Sabino MAC, Schwei MJ, Rogers SD, Mach DB, et al. Osteoprotegerin  
747 blocks bone cancer-induced skeletal destruction, skeletal pain and pain-related neurochemical  
748 reorganization of the spinal cord. *Nature Medicine*. 2000;6(5):521-8.
- 749 65. Vertex. Vertex Announces Positive Results From Phase 2 Study of VX-548 for the Treatment of  
750 Painful Diabetic Peripheral Neuropathy 2023 [Available from: [https://investors.vrtx.com/news-](https://investors.vrtx.com/news-releases/news-release-details/vertex-announces-positive-results-phase-2-study-vx-548-treatment)  
751 [releases/news-release-details/vertex-announces-positive-results-phase-2-study-vx-548-treatment](https://investors.vrtx.com/news-releases/news-release-details/vertex-announces-positive-results-phase-2-study-vx-548-treatment)].
- 752 66. Pope JE, Deer TR, Bruel BM, Falowski S. Clinical Uses of Intrathecal Therapy and Its Placement  
753 in the Pain Care Algorithm. *Pain Pract*. 2016;16(8):1092-106.
- 754 67. Mantyh WG, Jimenez-Andrade JM, Stake JJ, Bloom AP, Kaczmarek MJ, Taylor RN, et al.  
755 Blockade of nerve sprouting and neuroma formation markedly attenuates the development of late  
756 stage cancer pain. *Neuroscience*. 2010;171(2):588-98.
- 757 68. Sevcik MA, Ghilardi JR, Peters CM, Lindsay TH, Halvorson KG, Jonas BM, et al. Anti-NGF  
758 therapy profoundly reduces bone cancer pain and the accompanying increase in markers of peripheral  
759 and central sensitization. *PAIN*. 2005;115(1).
- 760 69. Franco ML, Melero C, Sarasola E, Acebo P, Luque A, Calatayud-Baselga I, et al. Mutations in  
761 TrkA Causing Congenital Insensitivity to Pain with Anhidrosis (CIPA) Induce Misfolding, Aggregation,  
762 and Mutation-dependent Neurodegeneration by Dysfunction of the Autophagic Flux. *J Biol Chem*.  
763 2016;291(41):21363-74.
- 764 70. de Clauser L, Luiz AP, Santana-Varela S, Wood JN, Sikandar S. Sensitization of Cutaneous  
765 Primary Afferents in Bone Cancer Revealed by In Vivo Calcium Imaging. *Cancers (Basel)*. 2020;12(12).
- 766 71. Yang Y, Zhang J, Gao Q, Bo J, Ma Z. Etanercept attenuates thermal and mechanical  
767 hyperalgesia induced by bone cancer. *Exp Ther Med*. 2017;13(5):2565-9.
- 768 72. Berenbaum F, Blanco FJ, Guermazi A, Miki K, Yamabe T, Viktrup L, et al. Subcutaneous  
769 tanezumab for osteoarthritis of the hip or knee: efficacy and safety results from a 24-week  
770 randomised phase III study with a 24-week follow-up period. *Ann Rheum Dis*. 2020;79(6):800-10.

771
